# Supplementary material for: Targeted deletion of GSNOR in hepatocytes of mice causes nitrosative inactivation of O6-alkylguanine-DNA alkyltransferase and increased sensitivity to genotoxic diethylnitrosamine
Source: PubMed Central journal article supplement — Carcinogenesis. 2011 Mar 8;32(7):973–7. doi: 10.1093/carcin/bgr041 (PMC3128557; doi:10.1093/carcin/bgr041), 2011-03-08
Supplement: supp_bgr041_Suppl_fig.pdf [file supp_bgr041_Suppl_fig.pdf]

**Supplemental data**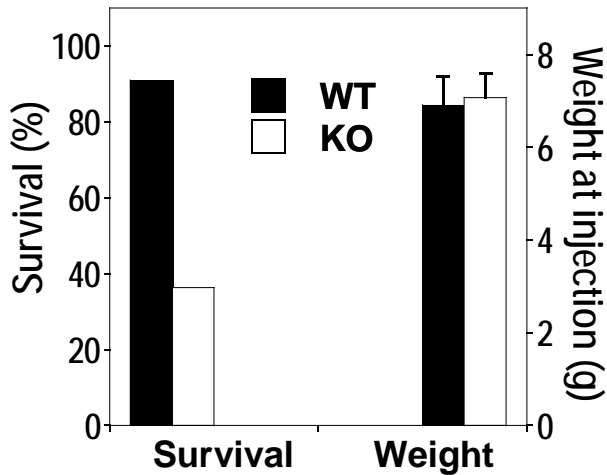

**Supplemental Figure 1. GSNOR<sup>-/-</sup> mice are prone to DEN induced mortality.** Wild-type (WT; n = 11) and GSNOR<sup>-/-</sup> (KO; n = 11) mice were injected with DEN (25µg/g body weight) at post-natal day 15 and survival of the mice was monitored for 6 days after DEN injection. Survival of GSNOR<sup>-/-</sup> mice compared to wild-type control was significantly reduced (P < 0.024, two-tailed Fisher's exact test). Average body weights at post-natal day 15 are from 6 wild-type and 5 GSNOR<sup>-/-</sup> mice.

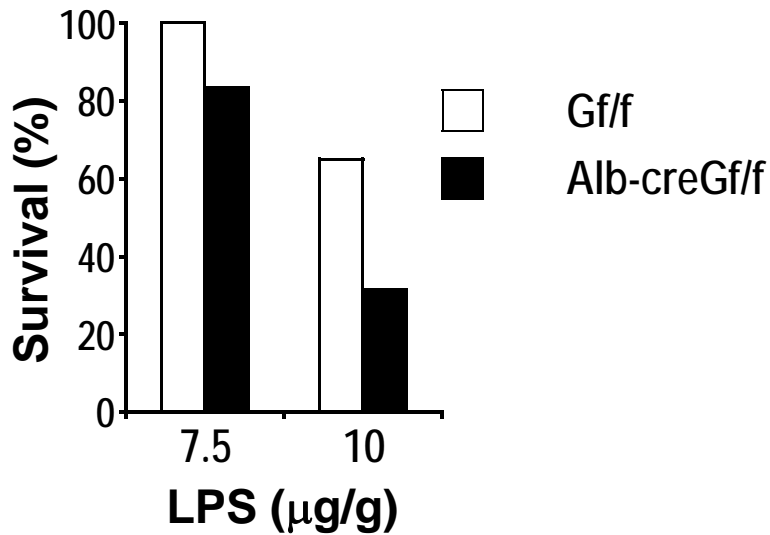

**Supplemental Figure 2. Reduced survival from hepatocyte deletion of GSNOR two days after a single intraperitoneal injection of LPS.** Five GSNOR<sup>f/f</sup> and twelve Alb-creGSNOR<sup>f/f</sup> mice (9- to 14-week-old) were injected with 7.5  $\mu\text{g/g}$  of LPS; 20 GSNOR<sup>f/f</sup> and 19 Alb-creGSNOR<sup>f/f</sup> mice were injected with 10  $\mu\text{g/g}$  of LPS. The survival data were analyzed by running the Nominal Logistic Fit model followed by Wald Chi-squared Test using JMPIN software.  $P < 0.025$ , GSNOR<sup>f/f</sup> vs. Alb-creGSNOR<sup>f/f</sup> mice.
